# Supplementary material for: Assessing risk of liver enzyme elevation in patients with immune-mediated diseases and different hepatitis B virus serostatus receiving anti-TNF agents: a nested case-control study
Source: Springer Nature journal article supplement (doi:10.1186/s13075-017-1413-y), 2017-09-29
Supplement: MOESM1 [file 15183212]

**Supplementary Table S1.** Clinical status of 30 patients who developed abnormal liver function during treatment with anti-TNF agents

| Disease | HBV serostatus |       |       | Prior ALT elevation <sup>a</sup> | Hepatic profile when ALT elevation occurred |                         |                      |                                       |                               | Medication profile when ALT elevation occurred |               |                  |             |                   | Management response to ALT elevation | ALT level after management response   |                |
|---------|----------------|-------|-------|----------------------------------|---------------------------------------------|-------------------------|----------------------|---------------------------------------|-------------------------------|------------------------------------------------|---------------|------------------|-------------|-------------------|--------------------------------------|---------------------------------------|----------------|
|         | HBsAg          | HbCAb | HBsAb |                                  | AST/ALT (x ULN)                             | Total bilirubin (mg/dl) | Coagulation          | Virology                              | Liver sonography <sup>b</sup> | Anti-TNF agent                                 | duration (mo) | MTX dose (mg/wk) | with folate | PRED dose (mg/dy) |                                      |                                       | Other DMARD(s) |
| RA      | +              | +     | ND    | No                               | NR/2.6                                      | NR                      | NR                   | ND                                    | PLD                           | ETA                                            | 7.0           | 7.5              | Yes         | 5                 | SSZ                                  | Stop ETA/MTX                          | Normal         |
| AS      | +              | +     | ND    | No                               | 3.5/5.5                                     | 0.47                    | NR                   | HBV DNA: 6491 IU/ml<br>HBeAg-, HBeAb+ | Normal                        | ADA                                            | 3.7           | 2.5              | Yes         | 0                 | SSZ                                  | Stop ADA/MTX                          | Normal         |
| RA      | +              | +     | ND    | Yes                              | 1.7/2.3                                     | NR                      | NR                   | ND                                    | PLD                           | ETA                                            | 0.7           | 7.5              | Yes         | 7.5               | HCQ/SSZ                              | Stop MTX, start antiviral therapy     | Normal         |
| RA      | +              | +     | ND    | No                               | NR/2.0                                      | NR                      | NR                   | ND                                    | Normal                        | ETA                                            | 1.6           | 7.5              | No          | 0                 | None                                 | Stop ETA                              | Normal         |
| RA      | +              | +     | ND    | No                               | NR/2.3                                      | NR                      | NR                   | ND                                    | ND                            | ETA                                            | 0.9           | 7.5              | No          | 5                 | SSZ                                  | None                                  | Normal         |
| RA      | +              | +     | ND    | No                               | 2.2/3.7                                     | NR                      | NR                   | HBeAg-                                | Normal                        | ETA                                            | 11.2          | 0                | NR          | 5                 | LEF/HCQ/SSZ                          | Stop ETA/PRED/LEF                     | Normal         |
| RA      | +              | +     | ND    | No                               | 22.6/33.9                                   | 1.68                    | PT: 11.4<br>INR: 1.2 | HBV DNA: 186940 IU/ml<br>HBeAg+       | Fatty liver                   | ETA                                            | 4.7           | 10               | Yes         | 2.5               | HCQ/SSZ                              | Stop ETA/MTX, start antiviral therapy | Normal         |
| RA      | +              | +     | ND    | Yes                              | 6.8/8.5                                     | 8.3                     | PT: 14.3<br>INR: 1.3 | HBV DNA: 5522132 IU/ml<br>HBeAg-      | Normal                        | ETA                                            | 0.9           | 15               | Yes         | 10                | HCQ/SSZ                              | Stop MTX/ETA, start antiviral therapy | Normal         |
| AS      | -              | +     | ND    | No                               | NR/2.8                                      | NR                      | NR                   | ND                                    | Fatty liver                   | ADA                                            | 1.9           | 15               | Yes         | 5                 | SSZ                                  | Stop MTX                              | Normal         |
| AS      | -              | +     | ND    | No                               | NR/2.4                                      | NR                      | NR                   | ND                                    | ND                            | ADA                                            | 10.3          | 0                | NR          | 0                 | None                                 | None                                  | Normal         |
| RA      | -              | +     | ND    | No                               | NR/2.5                                      | NR                      | NR                   | ND                                    | ND                            | ADA                                            | 12.0          | 15               | Yes         | 5                 | HCQ                                  | None                                  | Normal         |
| PsO     | -              | +     | ND    | No                               | 2.6/2.8                                     | NR                      | NR                   | ND                                    | PLD                           | ADA                                            | 1.9           | 10               | No          | 0                 | SSZ                                  | MTX 10→7.5 mg                         | Normal         |
| RA      | -              | +     | ND    | No                               | NR/3.2                                      | NR                      | NR                   | HBV DNA: negative                     | PLD                           | ADA                                            | 7.5           | 15               | No          | 7.5               | None                                 | MTX 15→10 mg                          | Normal         |
| PsO     | -              | +     | +     | Yes                              | 3.1/3.0                                     | NR                      | NR                   | ND                                    | PLD                           | ADA                                            | 7.5           | 0                | NR          | 0                 | CYS                                  | None                                  | Normal         |
| RA      | -              | +     | ND    | Yes                              | NR/2.1                                      | NR                      | NR                   | ND                                    | Fatty liver                   | ETA                                            | 1.6           | 7.5              | No          | 10                | SSZ                                  | Stop SSZ, add folate                  | Normal         |
| RA      | -              | +     | +     | Yes                              | NR/9.0                                      | NR                      | NR                   | ND                                    | Normal                        | ETA                                            | 6.3           | 10               | No          | 5                 | HCQ/SSZ                              | Stop MTX                              | Normal         |

|     |   |   |    |     |         |    |    |                      |             |     |      |    |     |      |             |                         |                       |
|-----|---|---|----|-----|---------|----|----|----------------------|-------------|-----|------|----|-----|------|-------------|-------------------------|-----------------------|
| RA  | - | + | ND | No  | NR/5.5  | NR | NR | ND                   | PLD         | ETA | 1.9  | 10 | No  | 7.5  | HCQ/SSZ     | MTX 10→5 mg             | Normal                |
| RA  | - | + | ND | No  | NR/2.2  | NR | NR | ND                   | ND          | ETA | 8.4  | 10 | Yes | 5    | SSZ         | Stop ETA, MTX 10→7.5 mg | Normal                |
| RA  | - | + | ND | No  | NR/3.6  | NR | NR | ND                   | Fatty liver | ETA | 10.3 | 10 | Yes | 5    | HCQ         | MTX 10→5 mg             | Normal                |
| RA  | - | + | ND | Yes | 1.6/2.1 | NR | NR | ND                   | ND          | ETA | 6.5  | 10 | Yes | 0    | HCQ/SSZ     | MTX 10→5 mg             | Normal                |
| PsA | - | + | ND | Yes | 2.9/5.7 | NR | NR | HBV DNA:<br>negative | Normal      | ETA | 0.7  | 0  | NR  | 5    | HCQ/SSZ/CYS | Stop ETA                | Normal                |
| AS  | - | + | +  | No  | NR/5.5  | NR | NR | ND                   | Fatty liver | ETA | 4.4  | 0  | NR  | 0    | SSZ         | Stop ETA                | Normal                |
| PsA | - | - | ND | No  | NR/3.0  | NR | NR | NR                   | ND          | ADA | 11.7 | 0  | NR  | 5    | CYS/LEF     | None                    | Normal                |
| RA  | - | - | ND | No  | 1.3/2.5 | NR | NR | NR                   | Fatty liver | ADA | 2.8  | 10 | No  | 5    | HCQ, SSZ    | MTX 10→5 mg             | Normal                |
| RA  | - | - | ND | No  | NR2.5   | NR | NR | NR                   | ND          | ETA | 4.7  | 15 | Yes | 5    | None        | MTX 15→12.5 mg          | Normal                |
| JRA | - | - | ND | No  | NR/3.6  | NR | NR | NR                   | Normal      | ETA | 7.6  | 10 | No  | 5    | AZA/HCQ     | None                    | Normal                |
| JRA | - | - | ND | No  | NR/2.2  | NR | NR | NR                   | ND          | ETA | 3.7  | 5  | Yes | 1.25 | None        | None                    | Normal                |
| AS  | - | - | ND | No  | NR/2.0  | NR | NR | NR                   | ND          | ETA | 4.7  | 0  | NR  | 0    | SSZ         | SSZ 1 g→500 mg          | Normal                |
| AS  | - | - | ND | No  | NR/7.1  | NR | NR | NR                   | ND          | ETA | 4.4  | 0  | NR  | 0    | SSZ         | SSZ 2 g→1 g             | Normal                |
| PsO | - | - | +  | Yes | 1.5/3.2 | NR | NR | NR                   | ND          | ETA | 11.2 | 0  | NR  | 0    | None        | None                    | Abnormality persisted |

TNF, tumor necrosis factor; HBV, hepatitis B virus; HBsAg, HBV surface antigen; HBcAb, HBV core antibody; HBsAb, HBV surface antibody; ALT/AST, alanine/aspartate aminotransferase; ULN, upper limit of normal; mo, month; wk, week; dy, day; DMARDs, disease-modifying anti-rheumatic drugs; MTX, methotrexate; PRED, prednisolone; HCQ, hydroxychloroquine; SSZ, sulfasalazine; CYS, cyclosporine; AZA, azathioprine; LEF, leflunomide; ETA, etanercept; ADA, adalimumab; HBeAg, HBV e antigen; HBeAb, HBV e antibody; RA, rheumatoid arthritis AS, ankylosing spondylitis; PsO, psoriatic arthritis; JRA, juvenile rheumatoid arthritis; PLD, parenchymal liver disease<sup>b</sup>; PT, prothrombin time; INR, international normalized ratio; IU, international units; ND, not done; NR, not reported.

<sup>a</sup> ALT >two-fold ULN during the past year of anti-TNF treatment.

<sup>b</sup> In Taiwan, ultrasound findings intermediate between “normal” and “cirrhosis” based on sonographic evaluation criteria for liver surface, liver parenchyma, hepatic vessels and spleen size, are diagnosed as “parenchymal liver disease”. These criteria are described in detail in: Hung CH, Lu SN, Wang JH, et al. Correlation between ultrasonographic and pathologic diagnoses of hepatitis B and C virus-related cirrhosis. *J Gastroenterol.* 2003;38:153–7.
